# Supplementary material
Source: publisher figshare collection journal article supplement (https://tandf.figshare.com/ndownloader/files/24424118)

# The Glacial Geomorphology of Western Dronning Maud Land, Antarctica

Newall, J.C.H.<sup>1,2,3</sup>, Dymova, T.<sup>1</sup>, Serra, E.<sup>1,4,5</sup>, Blomdin, R.<sup>1,2</sup>, Fredin, O.<sup>6,7</sup>, Glasser, N.F.<sup>8</sup>, Sukanuma, Y.<sup>9,10</sup>, Harbor, J.M.<sup>1,2,3,11,12</sup>, Stroeve, A.P.<sup>1,2</sup>

<sup>1</sup> Geomorphology & Glaciology, Department of Physical Geography, Stockholm University, Sweden

<sup>2</sup> Bolin Centre for Climate Research, Stockholm University, Sweden

<sup>3</sup> Department of Earth, Atmospheric, and Planetary Sciences, Purdue University, USA

<sup>4</sup> Institute of Geological Sciences, University of Bern, Switzerland

<sup>5</sup> Oeschger Centre for Climate Change Research, University of Bern, Switzerland

<sup>6</sup> Geological Survey of Norway, Norway

<sup>7</sup> Department of Geography, Norwegian University of Science and Technology, Norway

<sup>8</sup> Centre for Glaciology, Department of Geography and Earth Sciences, Aberystwyth University, UK

<sup>9</sup> National Institute of Polar Research, Japan

<sup>10</sup> SOKENDAI (Graduate University for Advanced Studies), Japan

<sup>11</sup> Department of Geography, University of Montana, USA

<sup>12</sup> Department of Geosciences, University of Montana, USA

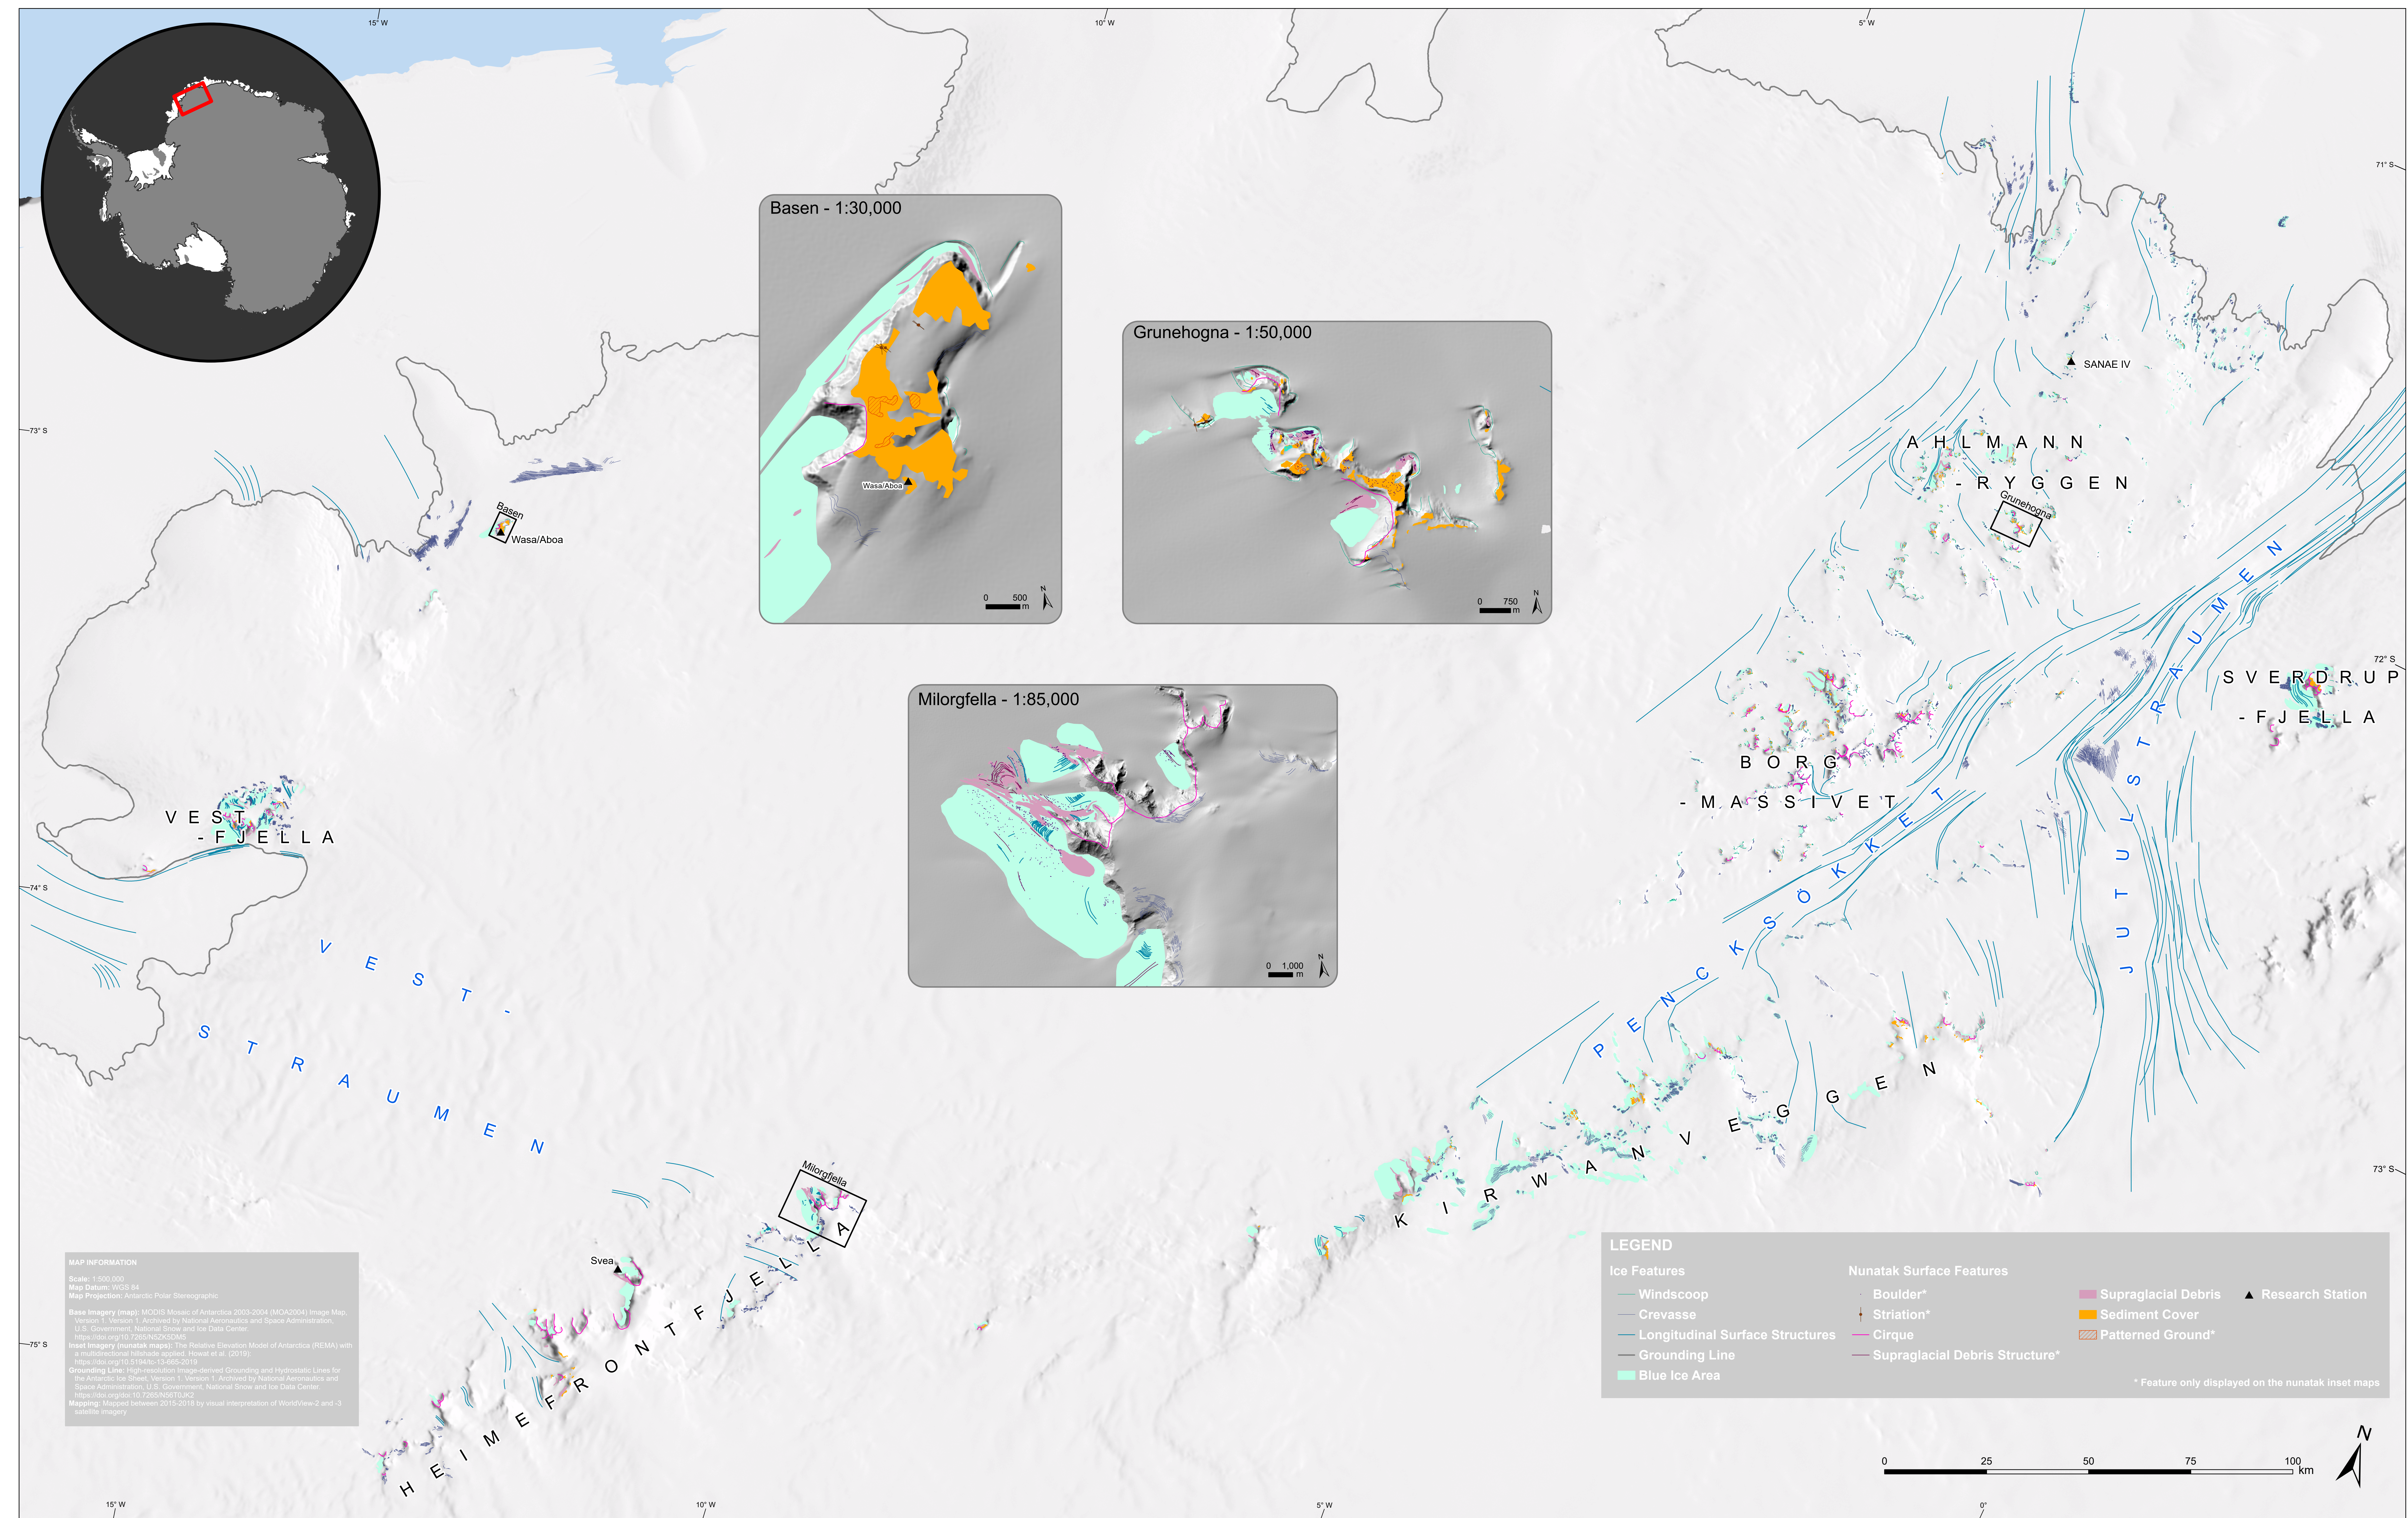

Supplement: Supplementary file 1 [file 24424118]
